# Supplementary material
Source: publisher figshare collection journal article supplement (https://tandf.figshare.com/ndownloader/files/22653062)

**Figure S1: CAIX expression on MSC.** MSC were stained with CAIX- specific antibody and analyzed with cytometer. Numbers indicate the % of stained cells.

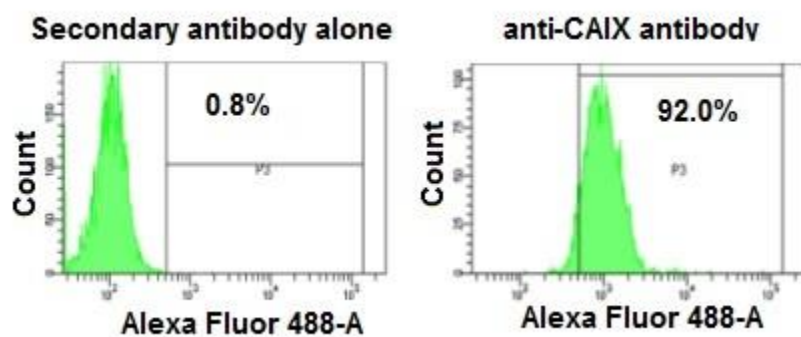

Supplement: Supplementary file [file 22653062]
